# Supplementary material
Source: PubMed Central journal article supplement (PMC3186691)
Supplement: Supp_Data.pdf [file Supp_Data.pdf]

## Supplementary Data

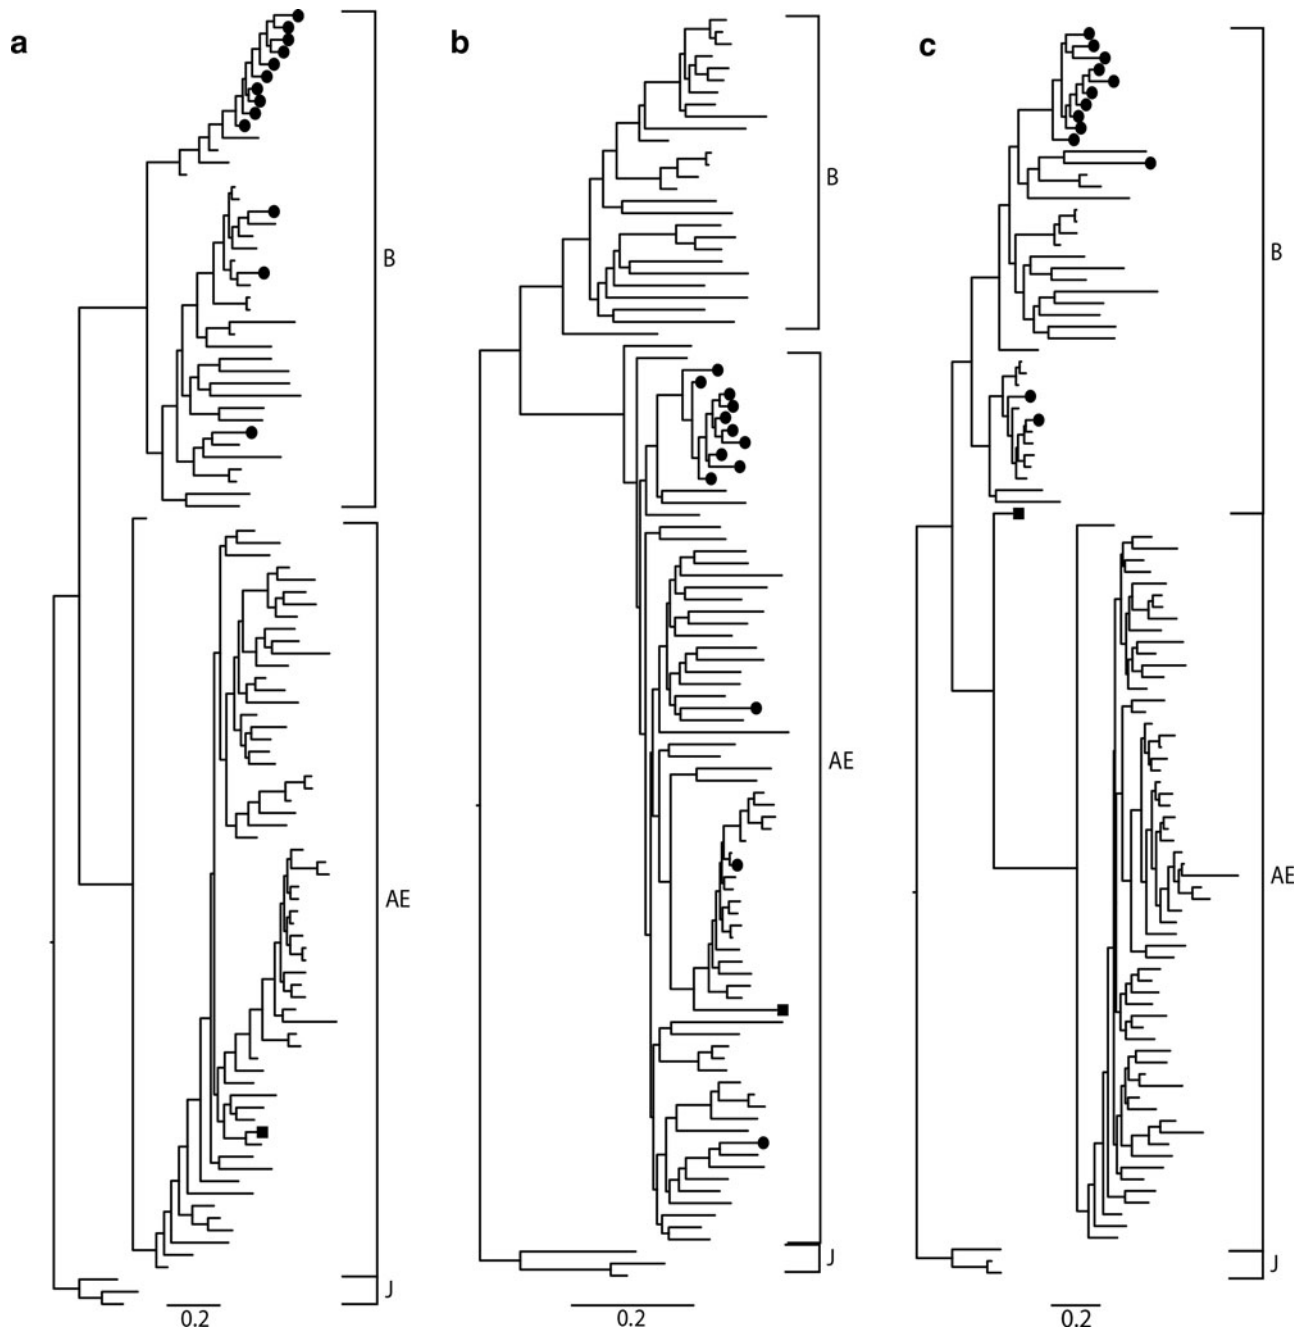

**SUPPLEMENTARY FIG. S1.** Phylogenies of 109 isolates successfully sequenced in all three regions. For clarity of presentation, only those clustering with subtype B and CRF01\_AE are shown. Regions shown are (a) protease, (b) gp120, and (c) gp41. Filled circles = 13 sequences with an RF1 pattern; filled square = one sequence with an RF2 pattern. Subtype J was included as an outgroup.
